# Supplementary material
Source: MDPI journal article supplement (https://www.mdpi.com/2073-4433/13/8/1169)
Supplement: s1 [file s1 › Document S1.pdf]

## Example of percentile rank calculation

Percent households that live in temporary dwelling units

Subcounty 1 – 4.5  
Subcounty 2 – 90  
Subcounty 3 – 50  
Subcounty 4 – 36.1  
Subcounty 5 – 76.5

Rank sub-counties from highest (higher number) to lowest (lower number) percent

Subcounty 2 – 5  
Subcounty 5 – 4  
Subcounty 3 – 3  
Subcounty 4 – 2  
Subcounty 1 – 1

Calculating percentile rank

$$\text{Percentile Rank} = \frac{(\text{Rank} - 1)}{(N - 1)}$$

$N = 5$

Subcounty 1 PR =  $(1-1)/(5-1) = 0$   
Subcounty 2 PR =  $(5-1)/(5-1) = 1$   
Subcounty 3 PR =  $(3-1)/(5-1) = 0.5$   
Subcounty 4 PR =  $(2-1)/(5-1) = 0.25$   
Subcounty 5 PR =  $(4-1)/(5-1) = 0.75$

Therefore,

The subcounty that had the highest percentile rank and highest percent households that live in temporary dwelling units was subcounty 2, which would mean this county is most vulnerable concerning housing structure. On the other hand, subcounty 1 had the lowest percentile rank and the lowest percent households that live in temporary dwelling units, this subcounty was the least vulnerable concerning housing structure.
