# Supplementary material
Source: MDPI journal article supplement (https://www.mdpi.com/2073-4433/13/8/1169)
Supplement: s1 [file s1 › Figure S1.pdf]

## Spatial Autocorrelation Report

**Moran's Index** 0.145512

**z-score** 76.353799

**p-value** 0.000000

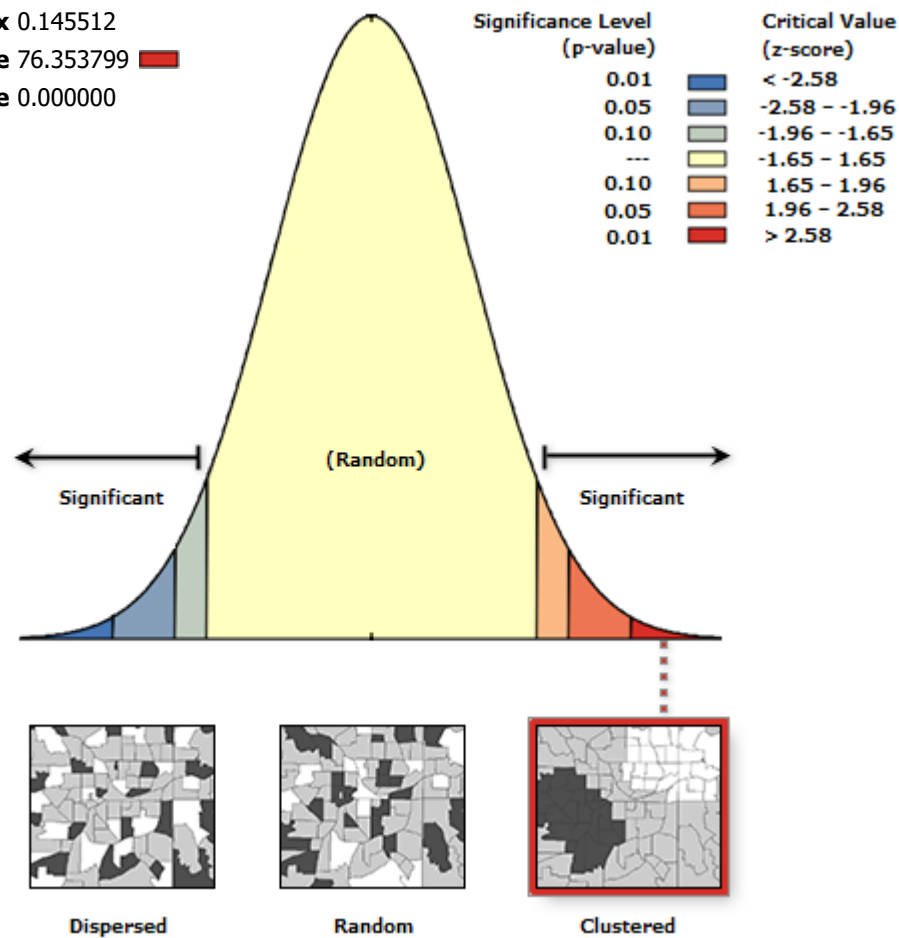

Given the z-score of 76.353799, there is a less than 1% likelihood that this clustered pattern could be the result of random chance.

## Global Moran's I Summary

|                       |           |
|-----------------------|-----------|
| <b>Moran's Index</b>  | 0.145512  |
| <b>Expected Index</b> | -0.000697 |
| <b>Variance</b>       | 0.000004  |
| <b>z-score</b>        | 76.353799 |
| <b>p-value</b>        | 0.000000  |

## Dataset Information

|                             |                         |
|-----------------------------|-------------------------|
| <b>Input Feature Class:</b> | Uganda                  |
| <b>Input Field:</b>         | USVI_GIS\$.PR_THEME_TOT |
| <b>Conceptualization:</b>   | FIXED_DISTANCE          |
| <b>Distance Method:</b>     | EUCLIDEAN               |

|                             |                    |
|-----------------------------|--------------------|
| <b>Row Standardization:</b> | True               |
| <b>Distance Threshold:</b>  | 148000.0000 Meters |
| <b>Weights Matrix File:</b> | None               |
| <b>Selection Set:</b>       | False              |
