# Supplementary material
Source: MDPI journal article supplement (https://www.mdpi.com/2073-4433/13/8/1169)

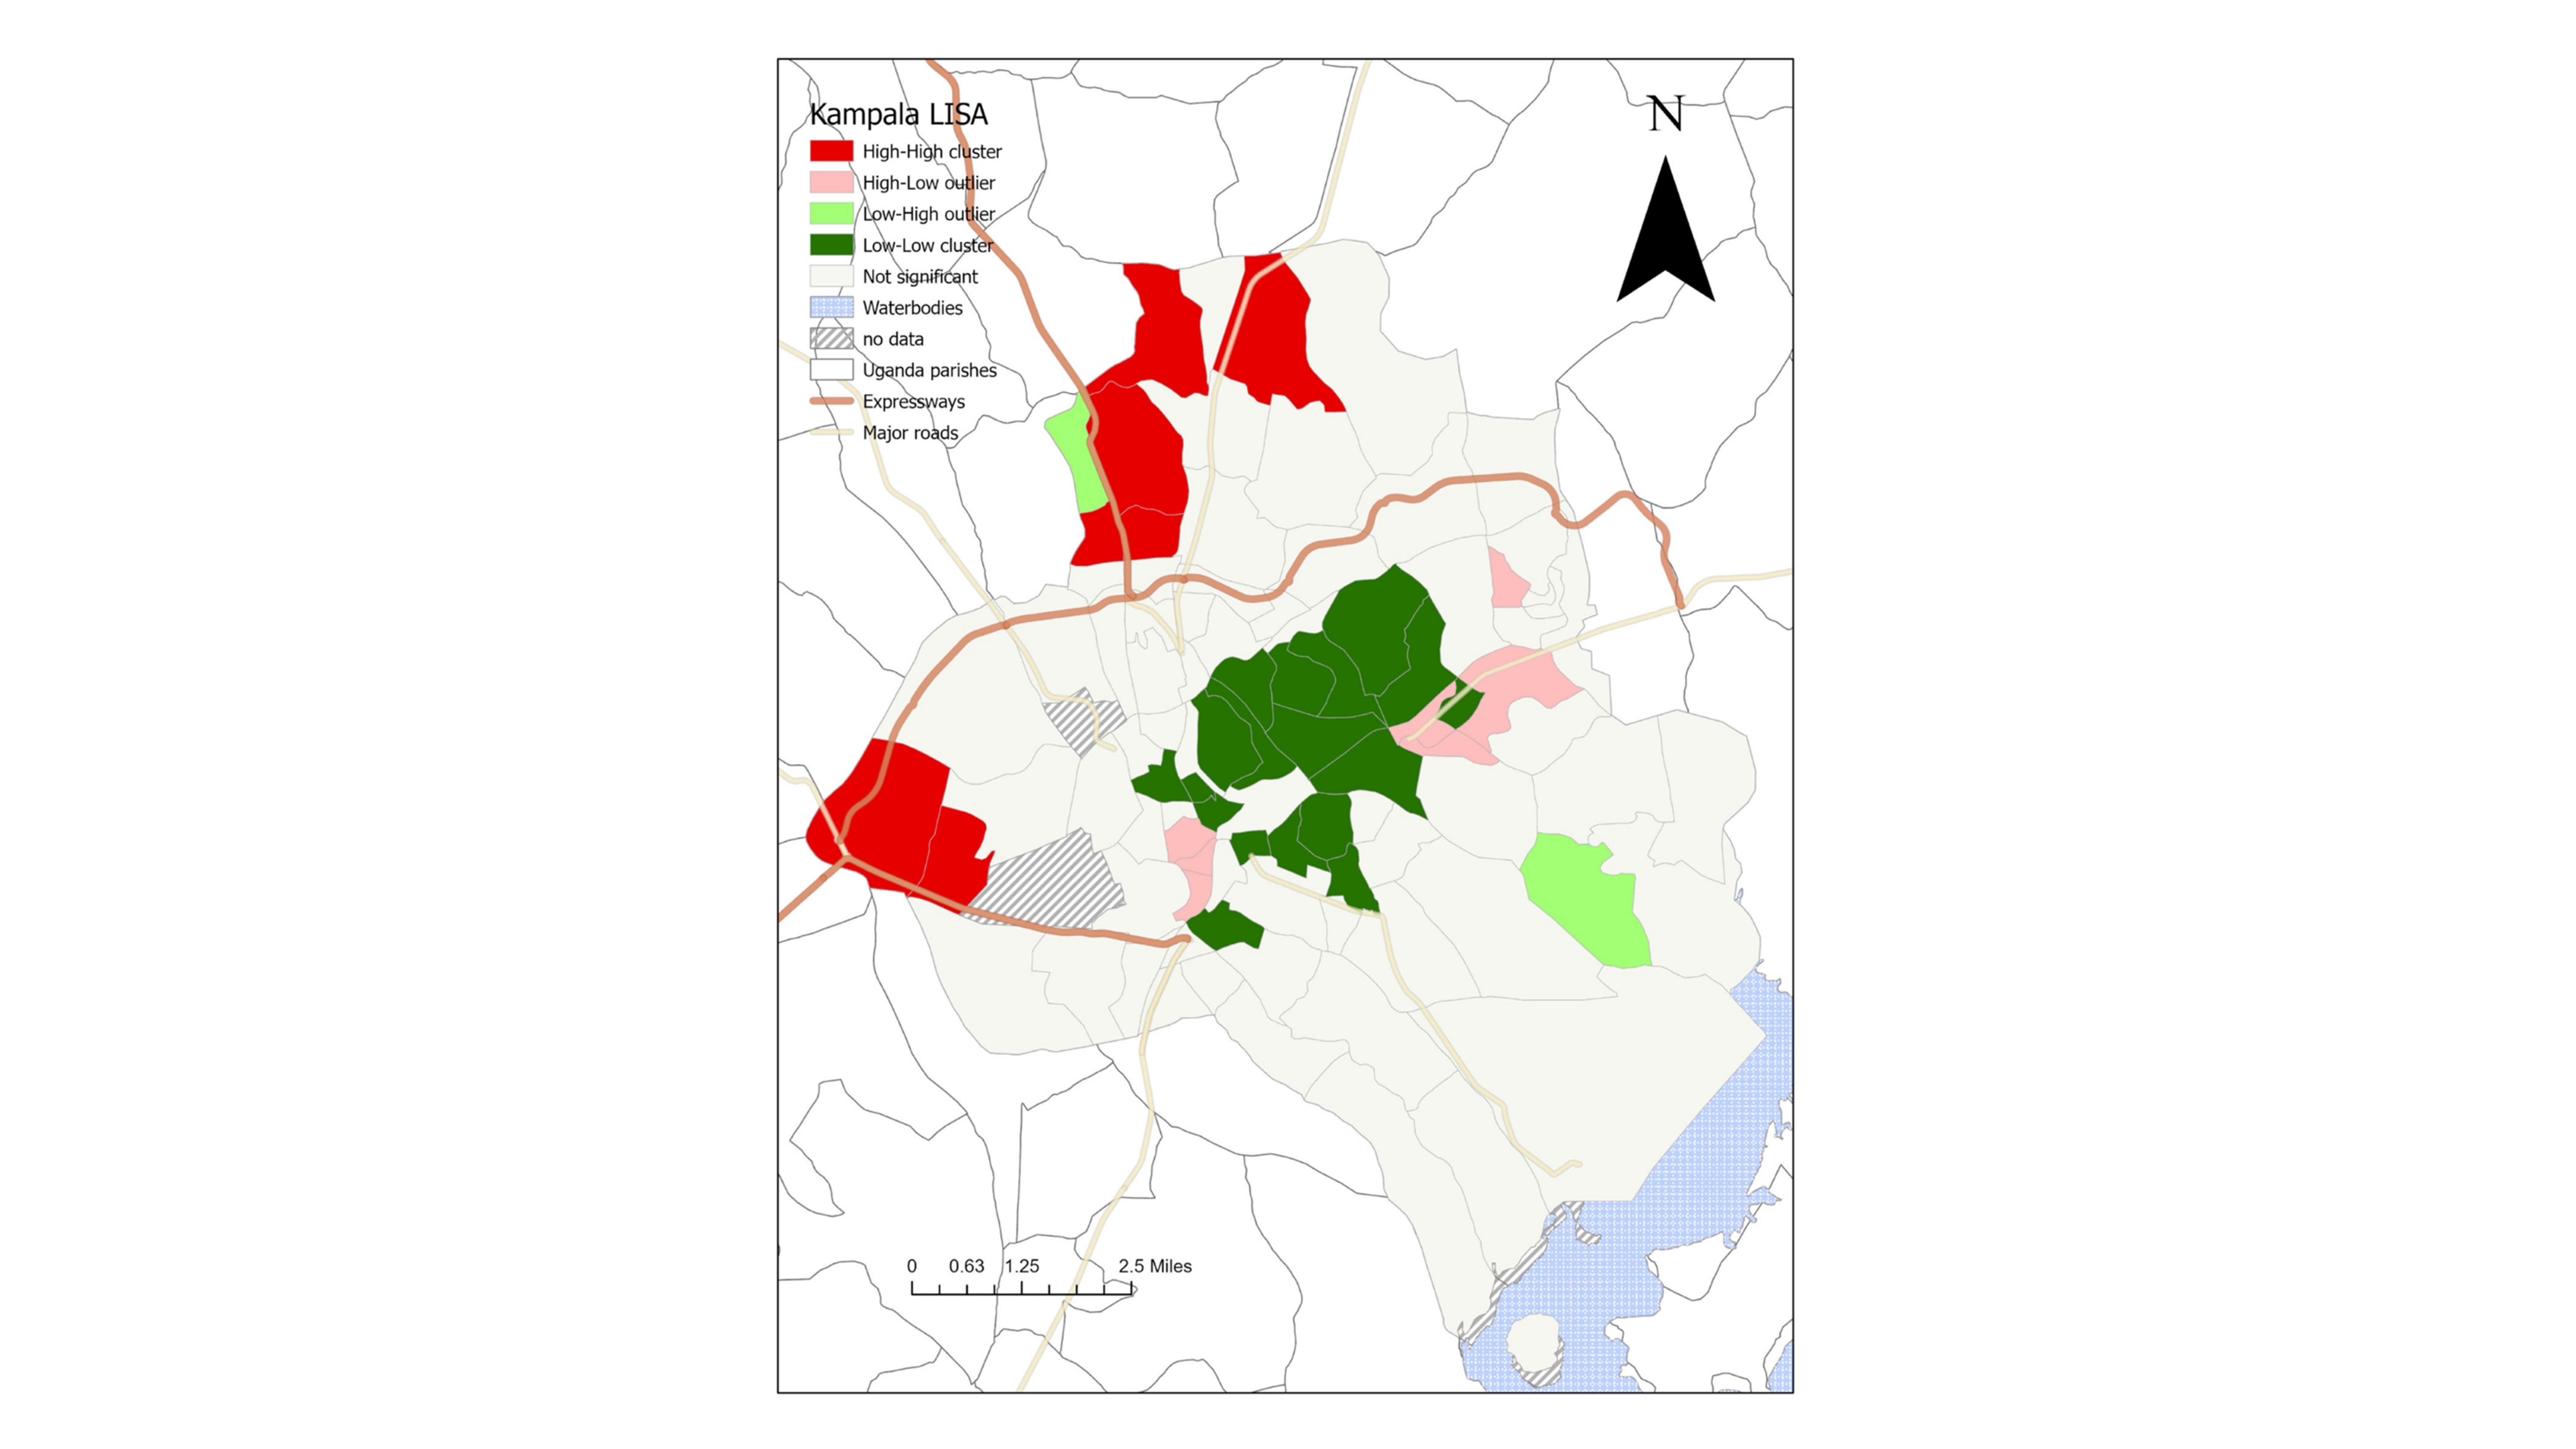

Supplement: s1 [file s1 › Figure S2.TIF]
